# Supplementary material
Source: publisher figshare collection journal article supplement (https://tandf.figshare.com/ndownloader/files/14892884)
Supplement: Supplementary file 1 [file 14892884]

Selective removal of pyridine in fuel by imprinted polymer (poly 4-vinyl aniline-*co*-DVB) as adsorbent

*Sinazo Mathidala and Adeniyi S. Ogunlaja**

*Department of Chemistry, Nelson Mandela University, P.O. Box 77000, Port Elizabeth 6031, South Africa*

**Supplementary data**

Fig.S1 TGA-DSC thermogram of pyridine imprinted poly 4-vinyl aniline-*co*-DVB

**Fig. S2.** Nitrogen adsorption-desorption isotherms for imprinted poly 4-vinyl aniline-co-DVB

Figure S3 LOD and LOQ of pyridine

Figure S4 (A) Amount of pyridine adsorbed and un-adsorbed, and (B) the corresponding adsorption capacities of the various concentration at constant mass of 150 mg at constant time of 24 h at 25˚C. 1: 79 mg/L, 2: 195 mg/L, 3: 234 mg/L, 4: 312 mg/L, 5: 391 mg/L, 6: 553 mg/L, 7: 869 mg/L, 8: 1548 mg/L, 9: 1637 mg/L)

Figure S5 (A) Amount of pyridine adsorbed and un-adsorbed by varying adsorbent mass at constant time of 24 h at 25˚C. (Where, 1= 150 mg, 2= 300 mg, 3= 450 mg, 4= 600 mg, and 5= 750 mg)

Figure S6 Langmuir adsorption isotherms of pyridine over poly aniline-*co*-DVB adsorbent

**Figure S7.** Graph of qt vs. time0.5

Figure S8 Distribution of nitrogen-containing compounds in model fuel

Figure S9 GC-FID chromatogram of hydrotreated diesel spiked with pyridine (100 mg/L). GC-FID conditions: DB-5 column (30 m x 0.25 mm x 0.25 μm) column; Oven temperature heating 50°C to 100°C for 10 min, then increased from 100°C to 300°C at a heating rate of 10°C.min-1 and finally held for 10 min.

Figure S10 GC-FID chromatogram of hydrotreated diesel after adsorption. GC-FID conditions: DB-5 column (30 m x 0.25 mm x 0.25 μm) column; Oven temperature heating 50°C to 100°C for 10 min, then increased from 100°C to 300°C at a heating rate of 10°C.min-1 and finally held for 10 min.

Figure S11. Optimized geometry of a unit of poly 4-vinyl aniline-*co*-DVB and pyridine adduct confirming the formation of hydrogen bonding.
